# Supplementary material
Source: Springer Nature journal article supplement (https://www.springermedizin.de/resource/supplementary/13058_2010_9489_MOESM7_ESM.pdf/9702258)

**A**

HMLE

vehicle

erlotinib

Control sh

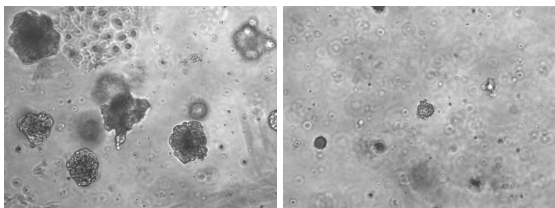

BRCA1 sh1

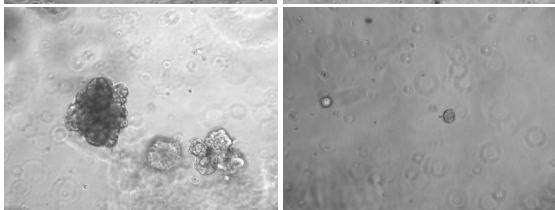

BRCA1 sh2

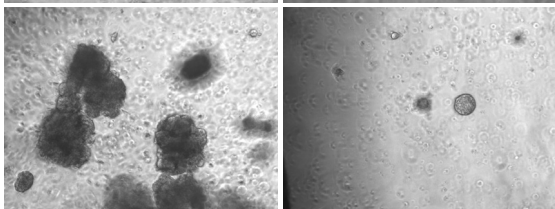**B**

MCF10A

vehicle

erlotinib

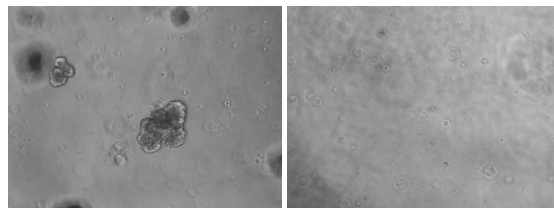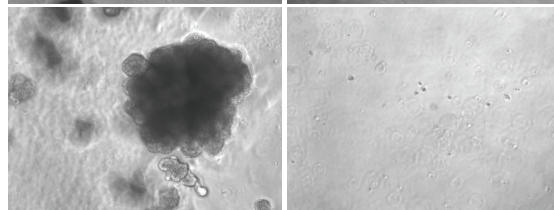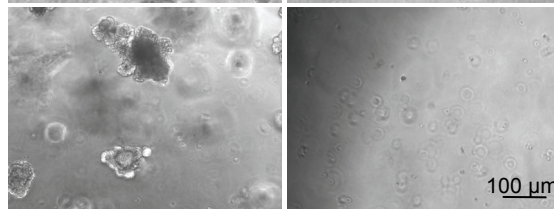**C**

HMECs

vehicle

erlotinib

BRCA1  
carriers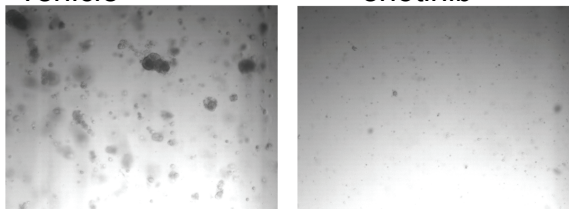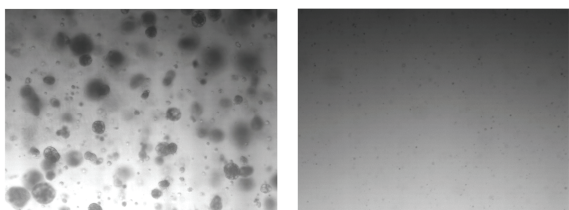Normal  
control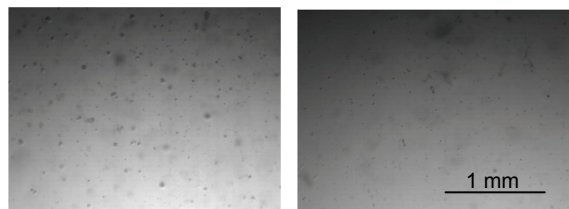**D**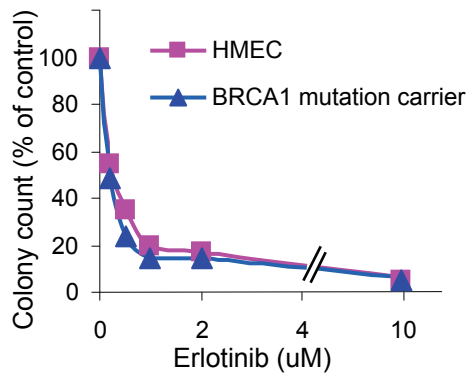**E**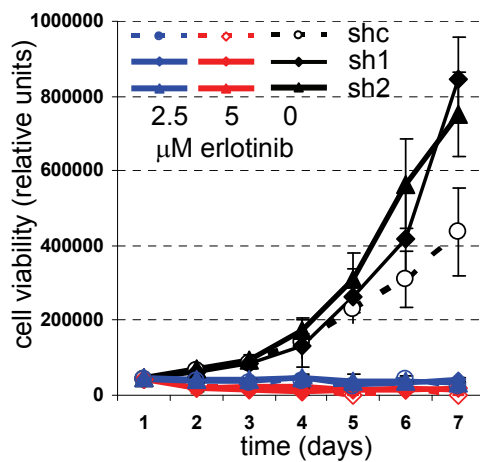

Supplement: MOESM7 [file 9702258]
